# Supplementary material for: Diaminoethane adsorption and water substitution on hydrated TiO2: a thermochemical study based on first-principles calculations
Source: Royal Society of Chemistry journal article supplement (doi:10.1039/c3cp44498h), 2013-01-01
Supplement: c3cp44498h.pdf [file c3cp44498h.pdf]

## Supplementary Infos

### *S1 Calculation of the different contributions to free energy of a molecule in the gas phase*

*Fvib<sub>T</sub>, Frot<sub>T</sub>, Ftrans<sub>T</sub> evaluations* The different contributions to free energy Fvib<sub>T</sub>, Ftrans<sub>T</sub>, Frot<sub>T</sub> of DAE and water are calculated considering a perfect gas.<sup>89</sup>

Fvib is defined as Fvib = ZPE + Fvib<sub>T</sub>

Where

$$\text{ZPE} = \mathcal{N} \left( \frac{1}{2} \sum_i h \nu_i \right)$$

$$\text{Fvib}_T = \mathcal{N} \sum_i \left( \frac{h \nu_i}{\exp\left(\frac{h \nu_i}{kT}\right) - 1} \right) - \mathcal{N} kT \left[ \sum_i \left( \frac{\left(\frac{h \nu_i}{kT}\right)}{\exp\left(\frac{h \nu_i}{kT}\right) - 1} \right) - \ln \left( 1 - \exp\left(-\frac{h \nu_i}{kT}\right) \right) \right]$$

where  $\mathcal{N}$  is the Avogadro number,  $k$  the Boltzmann constant,  $T$  the temperature,  $h$  the Planck constant, and  $\nu_i$  the vibrational modes.

The rotational free energy contribution of each reactant/product in the gas phase (water and DAE) was calculated with the formula:

$$\text{Frot}_T = \mathcal{N} kT \left\{ \frac{3}{2} - \left[ \ln \left( \frac{\sqrt{\pi}}{\sigma} \left( \frac{8\pi^2 kT}{h^2} \right)^{3/2} \sqrt{A_e \times B_e \times C_e} \right) + \frac{3}{2} \right] \right\}$$

where  $\sigma$  is a symmetry number, and  $A_e$ ,  $B_e$ ,  $C_e$  are inertial moments with respect to the molecule axis.

The translational free energy of each reactant/product in the gas phase (water and DAE) was calculated with the Sackur-Tetrode formula.<sup>90-92</sup>

$$\text{Ftrans}_T = \mathcal{N} kT \left[ \frac{3}{2} - (\ln q_t + 1 + 3/2) \right]$$

where

$$q_t = \left( \frac{2\pi m k_B T}{h^2} \right)^{3/2} \frac{k_B T}{P}$$

where m is the molecule (DAE or water) mass.

We calculated, in eV, in standard conditions (T = 298K and P = 1 atm)

|                     | TiO <sub>2</sub> -4H <sub>2</sub> O | DAE <sup>gas</sup> | H2O <sup>gas</sup> |
|---------------------|-------------------------------------|--------------------|--------------------|
| ZPE                 | 2.96                                | 2.91               | 0.55               |
| Fvib <sub>T</sub>   | 0.32                                | 0.08               | 0.04               |
| Frot <sub>T</sub>   |                                     | -0.28              | -0.11              |
| Ftrans <sub>T</sub> |                                     | -0.46              | -0.41              |

## *S2 Thermal Contributions to Free Energy of the adsorbed DAE molecule*

When the ‘surface’ includes an adsorbate,  $G(\text{surf})$  can be decomposed in two components,  $G(\text{mol-ads})$  and  $G(\text{surf-noads})$ .  $G(\text{surf-noads})$  is the contribution of the surface without adsorbate and  $G(\text{mol-ads})$  the contribution of the adsorbed molecules. To evaluate free energy balance before and after adsorption, we consider only variations of the component  $G(\text{surf}) = G(\text{mol-ads})$ , which means that the properties of the adsorbed molecule (vibrational, rotational and translational) are taken into account but not variations of free energy of the bulk phase ( $\text{TiO}_2$ ). In this context, for each adsorbed molecule, we consider that  $\text{Frot}(\text{mol-ads})_T = 2/3 \text{Frot}(\text{mol})_{T,\text{gas}}$  when this molecule has no nearest neighbor in the same [010] row and otherwise  $\text{Frot}(\text{mol-ads})_T = 0$ ; thus  $\text{Frot}(\text{mol-ads})_T = 2/3 \text{Frot}(\text{mol})_{T,\text{gas}}$ ,  $\text{Frot}(\text{mol-ads})_T = 4/3 \text{Frot}(\text{mol})_{T,\text{gas}}$ ,  $\text{Frot}(\text{mol-ads})_T = 2/3 \text{Frot}(\text{mol})_{T,\text{gas}}$  and  $\text{Frot}(\text{mol-ads})_T = 0$  for one, two, three and four adsorbed molecules per cell, respectively. Then we write  $\Delta \text{Frot}_{\text{ads}} = \text{Frot}(\text{mol-ads})_T - \text{Frot}(\text{mol})_{T,\text{gas}}$

Similar considerations are valid for the  $\text{Ftrans}(\text{surf})$  term. In this case, the translational free energy of adsorbed DAE molecules are calculated considering that  $\text{Ftrans}(\text{mol-ads})_T = 2/3 \text{Ftrans}(\text{mol})_{T,\text{gas}}$  for DAE molecules adsorbed at low coverages (1.28 and 2.56 molecule/nm<sup>2</sup>), and zero in all other cases. Then we write  $\Delta \text{Ftrans}_{\text{ads}} = \text{Ftrans}(\text{mol-ads})_T - \text{Ftrans}(\text{mol})_{T,\text{gas}}$ . For DAE substituting water molecules, the translational energy is zero.

Table SI: Calculated values (in eV) of the vibrational, translation al and rotational free energies of the different configurations considered. ‘Ads’ refers to DAE adsorbed above a water layer. “Subst” refers to DAE adsorbed in substitution of water molecules.

| System and coverage<br>(molecule/m <sup>2</sup> ) | Fvib(T) (ads) | Frot(ads) | Ftrans(ads) |
|---------------------------------------------------|---------------|-----------|-------------|
| DAE Ads<br>$\theta=1.28$                          | 0.46          | -0.18     | -0.30       |
| 2 DAE Ads<br>$\theta=2.56$                        | 0.65          | -0.37     | -0.61       |
| 3 DAE ads<br>$\theta=3.84$                        | 0.82          | -0.18     | 0           |
| 4 DAE Ads<br>$\theta=5.12$                        | 1.09          | 0         | 0           |
| DAE subst<br>$\theta=1.28$                        | 0.28          | 0         | 0           |
| 2 DAE subst<br>$\theta=2.56$                      | 0.32          | 0         | 0           |
| 3 DAE subst<br>$\theta=3.84$                      | 0.34          | 0         | 0           |
| 4 DAE on TiO <sub>2</sub><br>$\theta=5.12$        | 0.54          | 0         | 0           |

### *S3 Configurational Entropy*

Configurational entropy was also considered for each DAE coverage. For each system, the – TS<sub>config</sub> term to the free energy estimation:

$S_{\text{conf}} = k \ln[(N - n)!/(N!n!)]$  for n sites occupied by DAE over N surface sites.

Applying the Stirling formula yields

$$TS_{\text{config}} = \mathcal{N}kT \ln \left( \left(1 + \frac{n}{N}\right) + \frac{n}{N} \ln \left(1 + \frac{n}{N}\right) \right)$$

TS<sub>config</sub> can thus be estimated per surface area. This value was found to be negligible in the present system.
